# Supplementary material for: Dual inhibition of ABCE1 and LCP1 by microRNA-96 results in an additive effect in breast cancer mouse model
Source: PubMed Central journal article supplement (PMC6459344; doi:10.18632/oncotarget.26747), 2019-03-12
Supplement: oncotarget-10-2086-s001.pdf [file oncotarget-10-2086-s001.pdf]

## Dual inhibition of ABCE1 and LCP1 by microRNA-96 results in an additive effect in breast cancer mouse model

### SUPPLEMENTARY MATERIALS

**Supplementary Table 1: SYBR green RT-PCR primers for mRNA quantification**

| Primer name          | Sequence                  |
|----------------------|---------------------------|
| M Lcp1 For           | TCTCACTGTCACGGTGGTTGGC    |
| M Lcp1 Rev           | CTCAAATCTCCAGAGAAGCAAGCAC |
| H Lcp1 For           | CGTTGGCACCCAACACTCCTA     |
| H Lcp1 Rev           | GGGATGACATGCCGACAATCAG    |
| M $\beta$ -Actin-For | ACCAGAGGCATACAGGGACA      |
| M $\beta$ -Actin-Rev | CTAAGGCCAACCGTGAAAAG      |
| H GAPDH-For          | AGCCACATCGCTGAGACA        |
| H GAPDH-Rev          | GCCCAATACGACCAAATCC       |

Abbreviations: \*H-human, M-mouse.

**Supplementary Table 2: Primary antibody used for Western blot analysis**

| Antibody         | Manufacturer | catalog number    | Dilution |
|------------------|--------------|-------------------|----------|
| Mouse anti-LCP1  | Santa Cruz   | sc-133219         | 1:1000   |
| Mouse anti-Actin | Millipore    | clone C4, MAB1501 | 1:5000   |

**Supplementary Table 3: Secondary antibody used for Western blot analysis**

| Antibody                                      | Manufacturer                              | Catalog number | Dilution |
|-----------------------------------------------|-------------------------------------------|----------------|----------|
| HRP-conjugated AffiniPure Goat-anti-Mouse IgG | Jackson ImmunoResearch Laboratories, Inc. | 115-035-166    | 1:10000  |



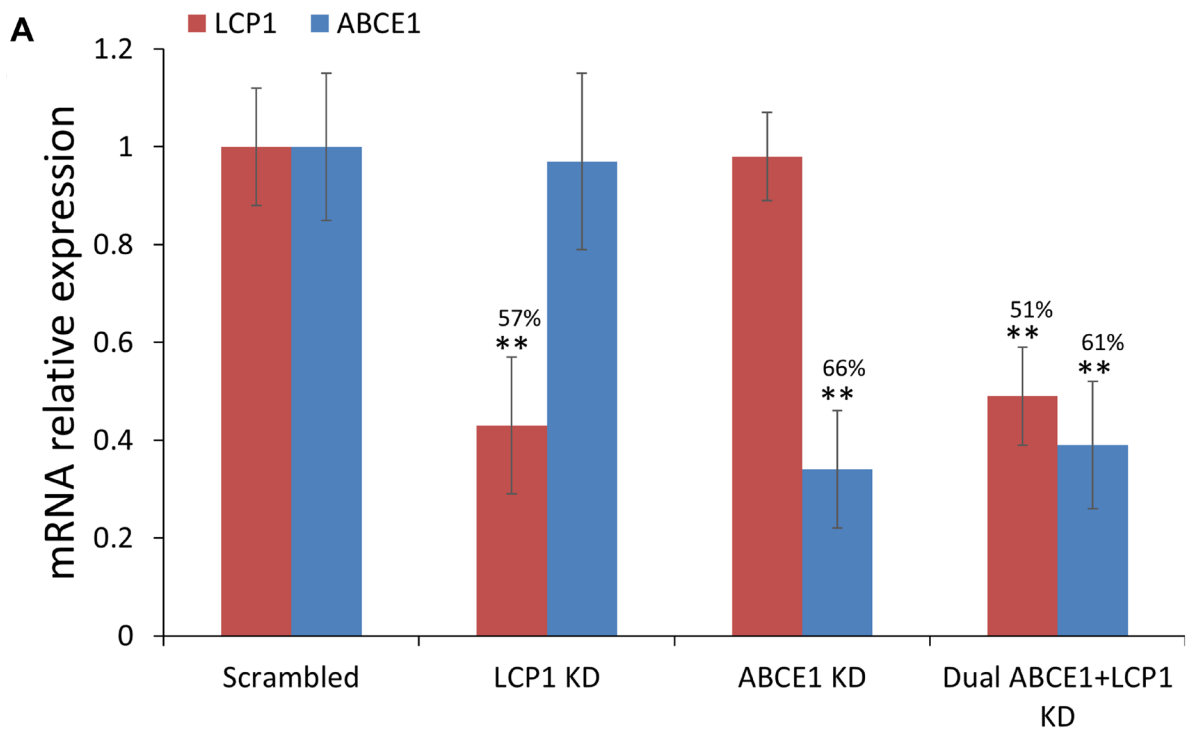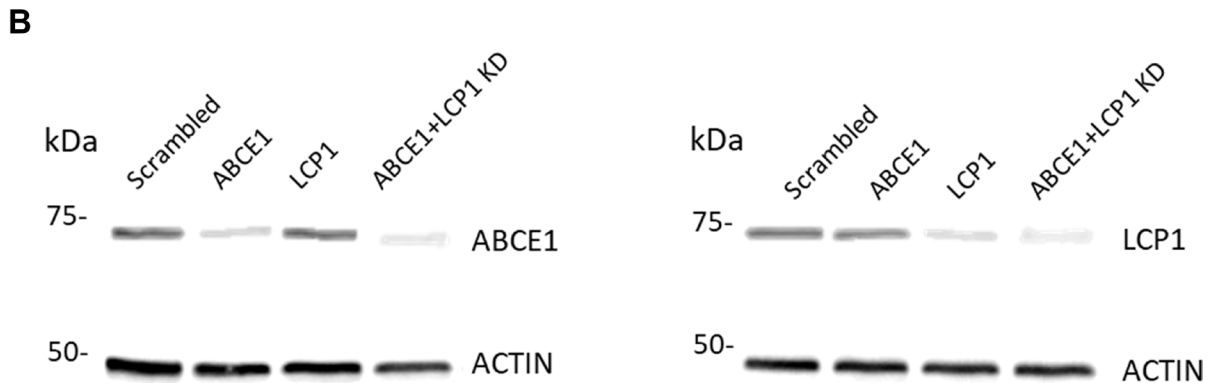

**Supplementary Figure 2: LCP1 and ABCE1 mRNA and protein expression in cells that stably underexpress Abce1, Lcp1, Abce1+Lcp1, or scrambled.** (A) Expression levels of ABCE1 and LCP1 were calculated for 4T1 cells stably transfected with shRNAs against Abce1/ Lcp1/Abce1+ Lcp1/ scrambled. ABCE1 RNA expression was reduced in ABCE1 KD and ABCE1+LCP1 KD tumors, while LCP1 was decreased in LCP1 KD and ABCE1+LCP1 derived tumors. (B) Western blot analysis of protein extracted from the cells in (A) revealed reduced protein expression of Abce1 in Abce1 KD and dual Abce1+Lcp1 KD groups compared to the scrambled group, while the Lcp1 protein expression level was reduced in the Lcp1 KD and the dual Abce1+ Lcp1 KD groups compared to the scrambled group. Data is presented as mean  $\pm$  SEM. \*\* $p < 0.01$ .

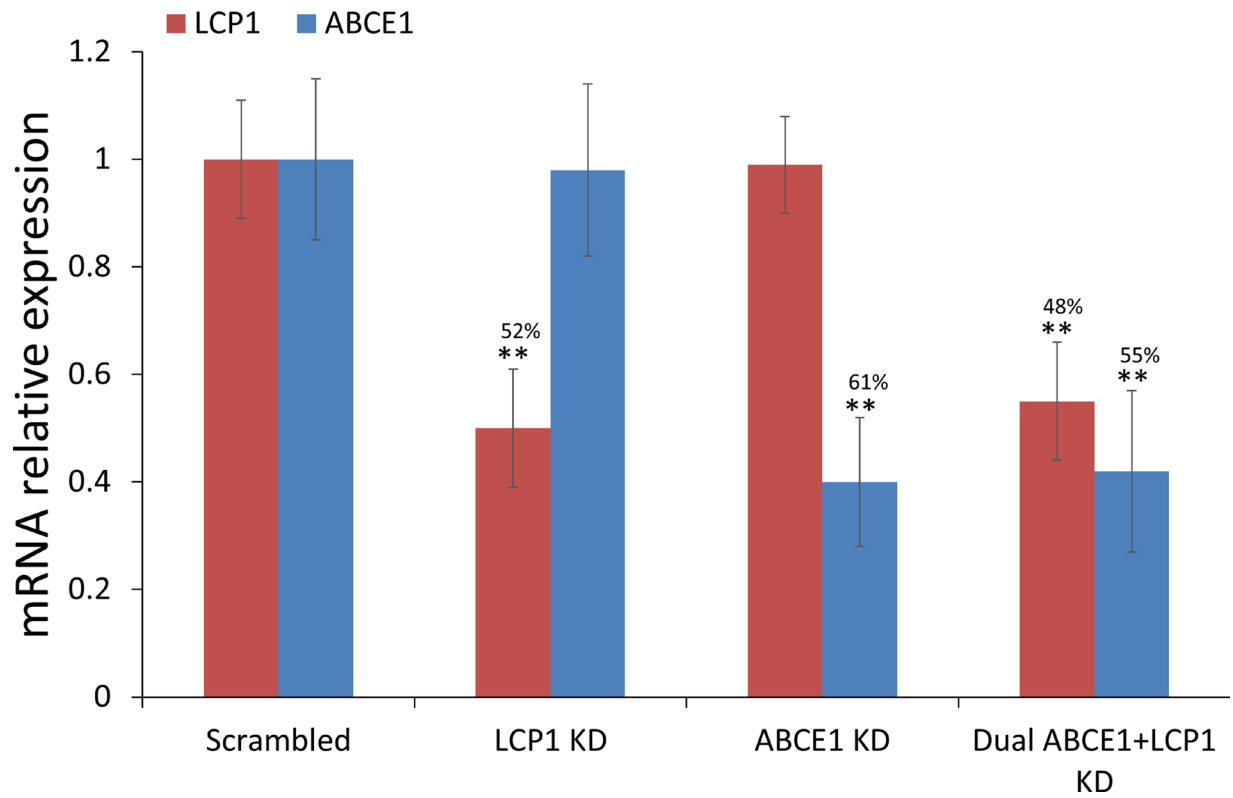

**Supplementary Figure 3: LCP1 and ABCE1 mRNA expression in mouse tumors.** Expression levels of ABCE1 and LCP1 were calculated for breast tumors originating from Abce1 KD, Lcp1 KD, Abce1 KD+Lcp1 KD, or scrambled 4T1 cells. ABCE1 RNA expression was reduced in ABCE1 KD and ABCE1+LCP1 KD tumors, while LCP1 was decreased in LCP1 KD and ABCE1+LCP1 derived tumors. Data is presented as mean  $\pm$  SEM. \*\* $p < 0.01$ .
